# Supplementary material for: The Micro-Immunotherapy Medicine 2LEID Exhibits an Immunostimulant Effect by Boosting Both Innate and Adaptive Immune Responses
Source: MDPI journal article supplement (doi:10.3390/ijms23010110), 2021-12-22

No signal Mono/Macro #A

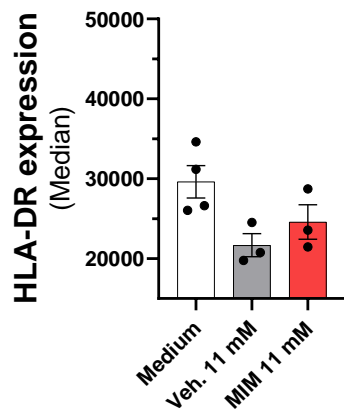

Anti-CD3 Mono/Macro #A

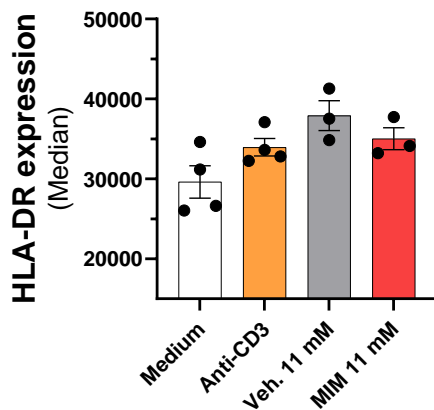

Anti-CD3 + Anti-CD28 Mono/Macro #A

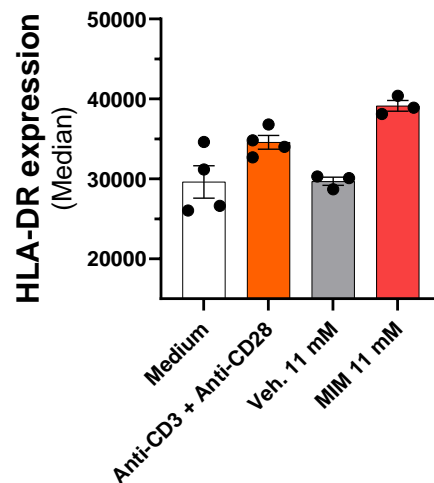

No signal Mono/Macro #B

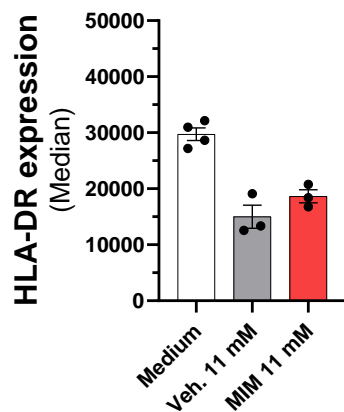

Anti-CD3 Mono/Macro #B

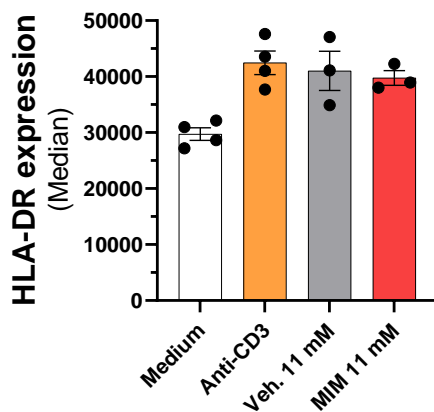

Anti-CD3 + Anti-CD28 Mono/Macro #B

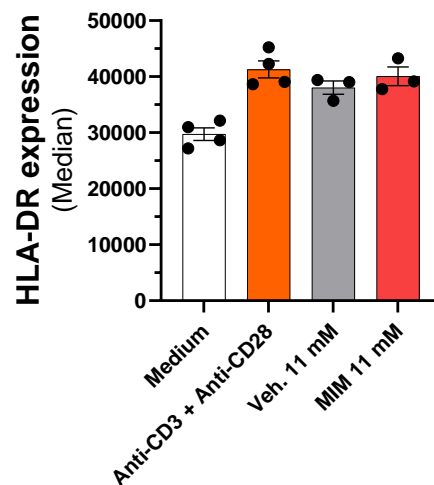

No signal Mono/Macro #D

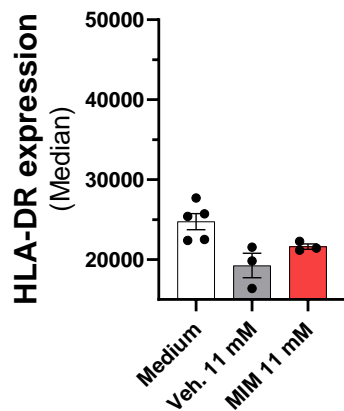

Anti-CD3 Mono/Macro #D

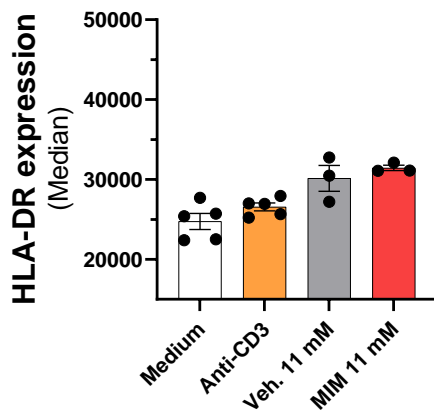

Anti-CD3 + Anti-CD28 Mono/Macro #D

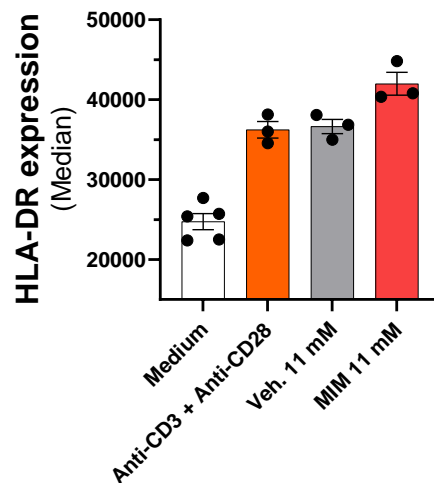

Supplement: s1 [file s1]
