# Supplementary figures and images for: The Micro-Immunotherapy Medicine 2LEID Exhibits an Immunostimulant Effect by Boosting Both Innate and Adaptive Immune Responses
Source: MDPI journal article supplement (doi:10.3390/ijms23010110), 2021-12-22

**A**

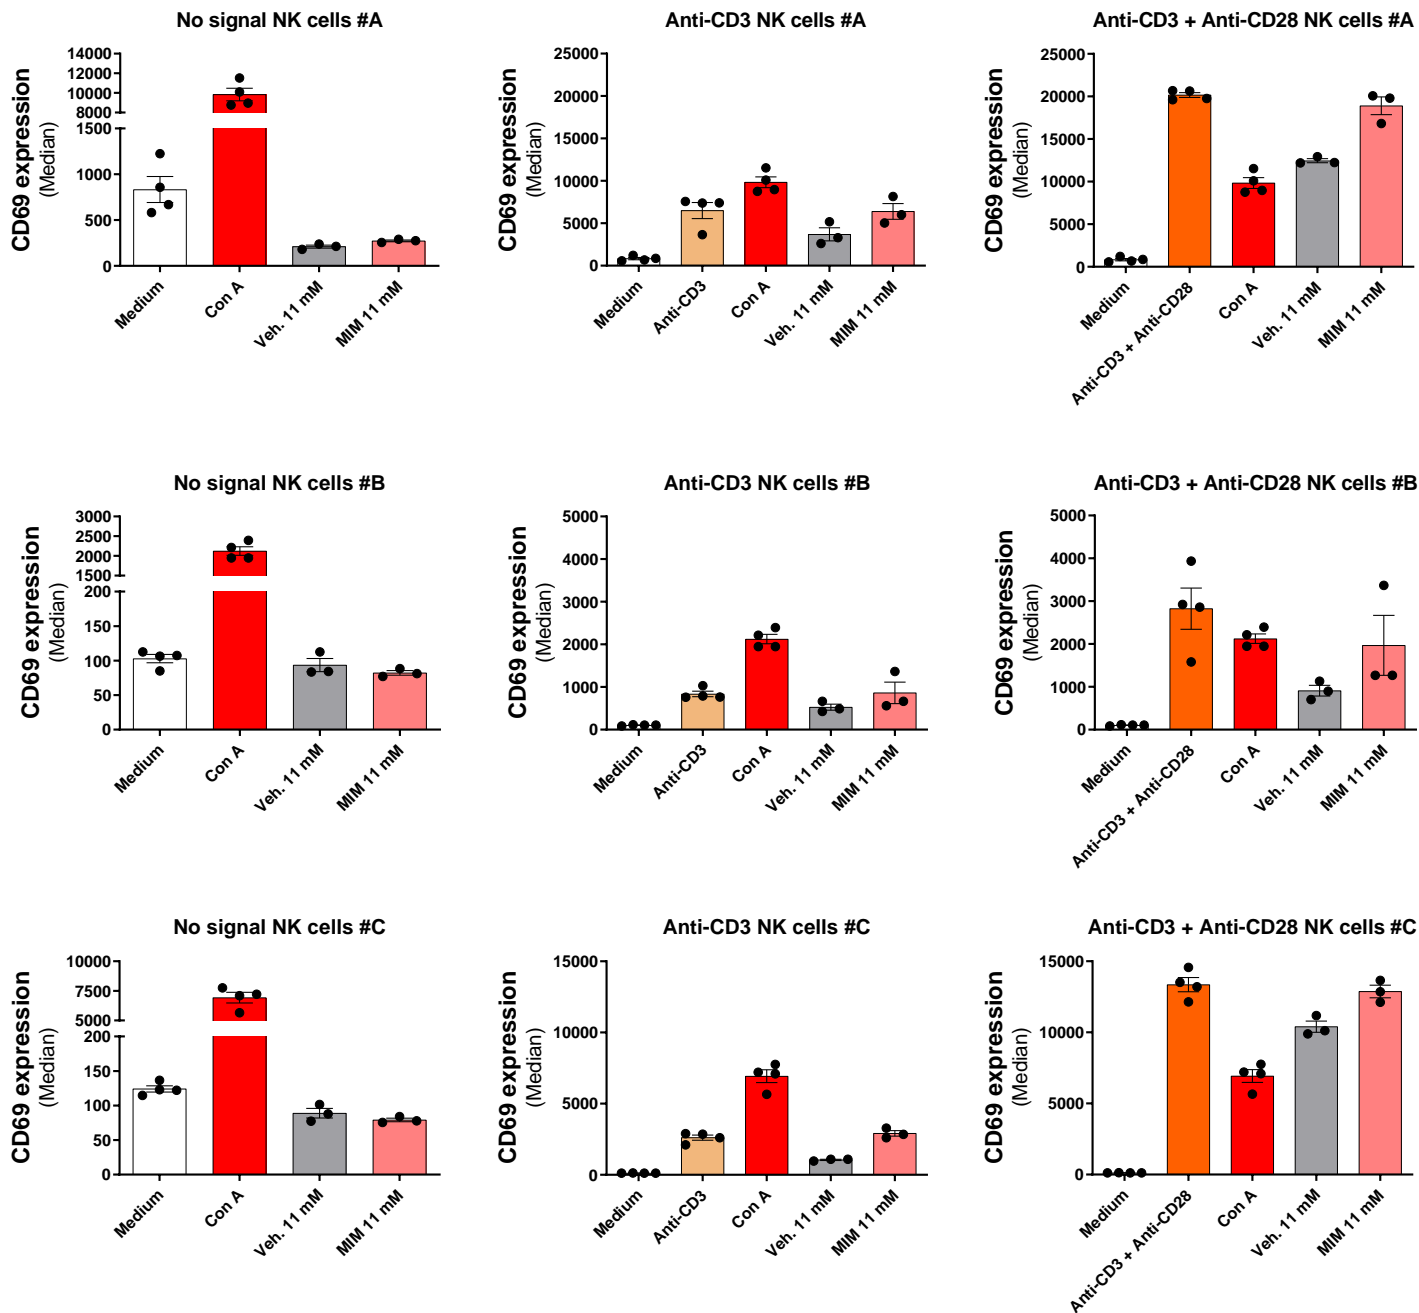

**B**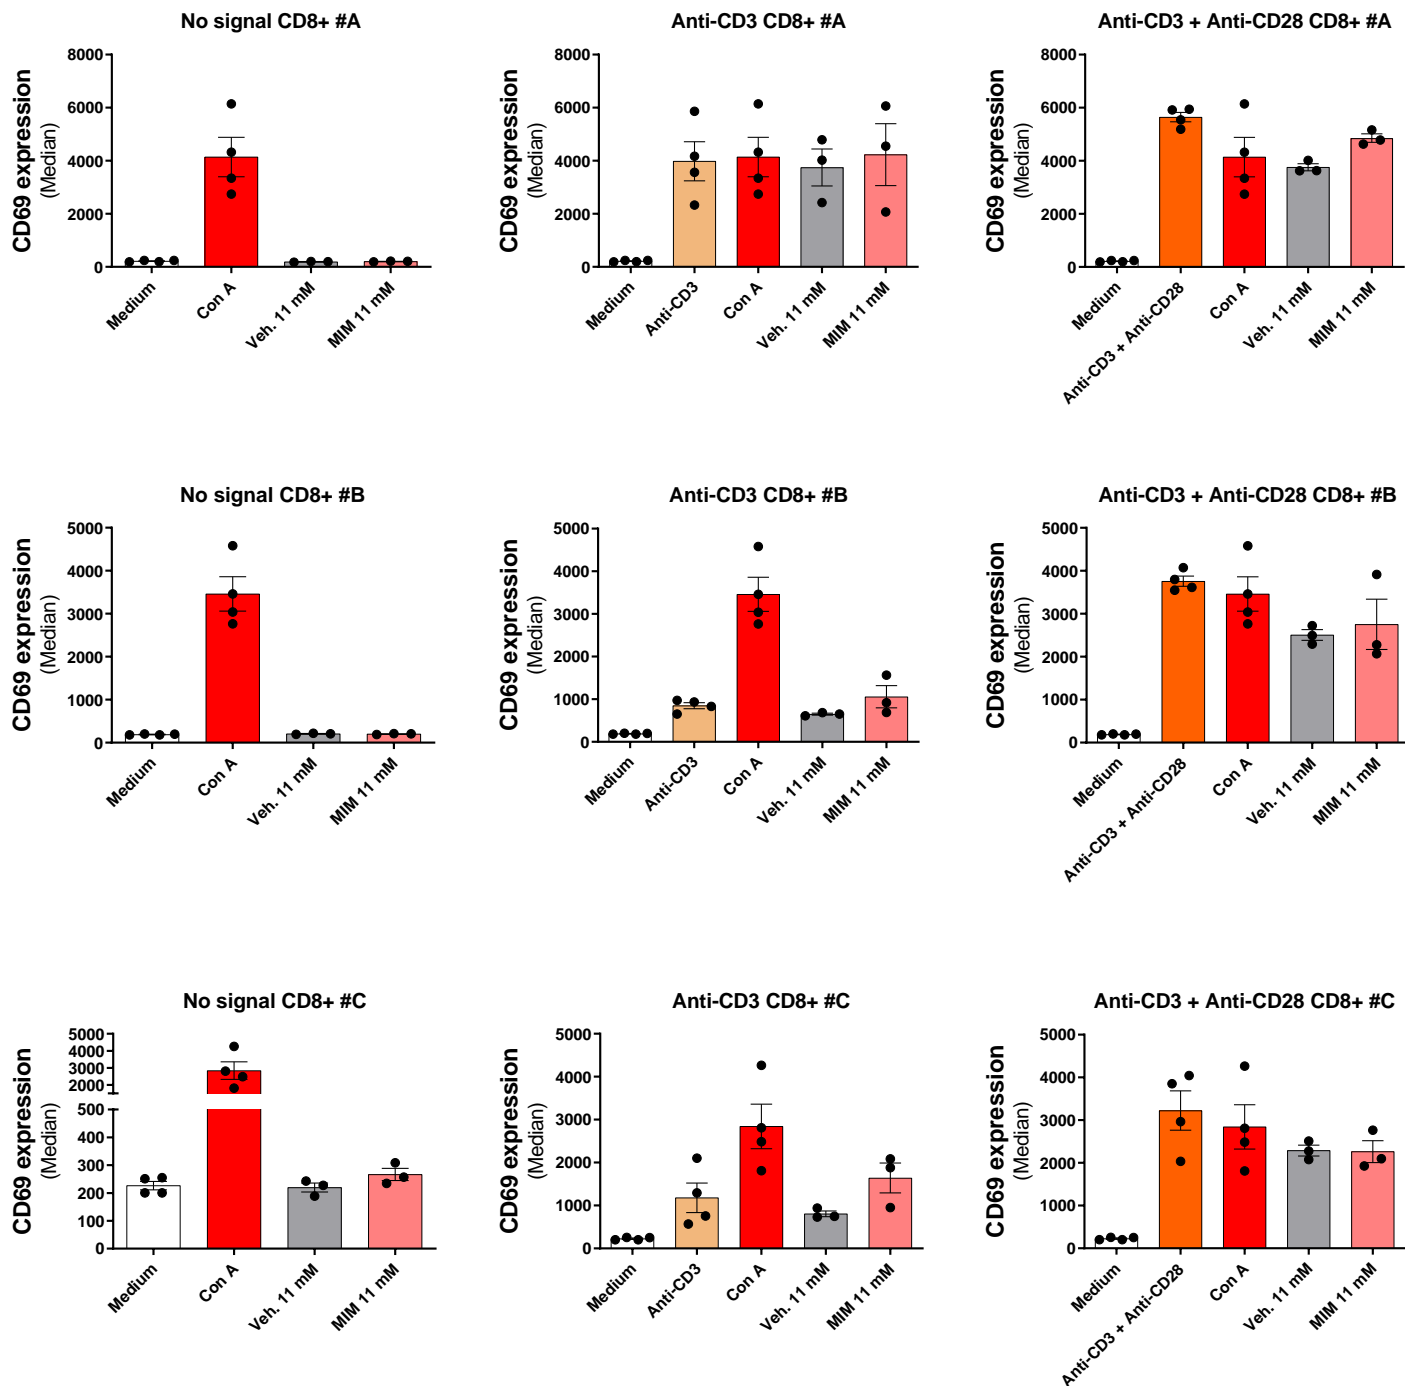

Supplement: s1 [file s1]

**A**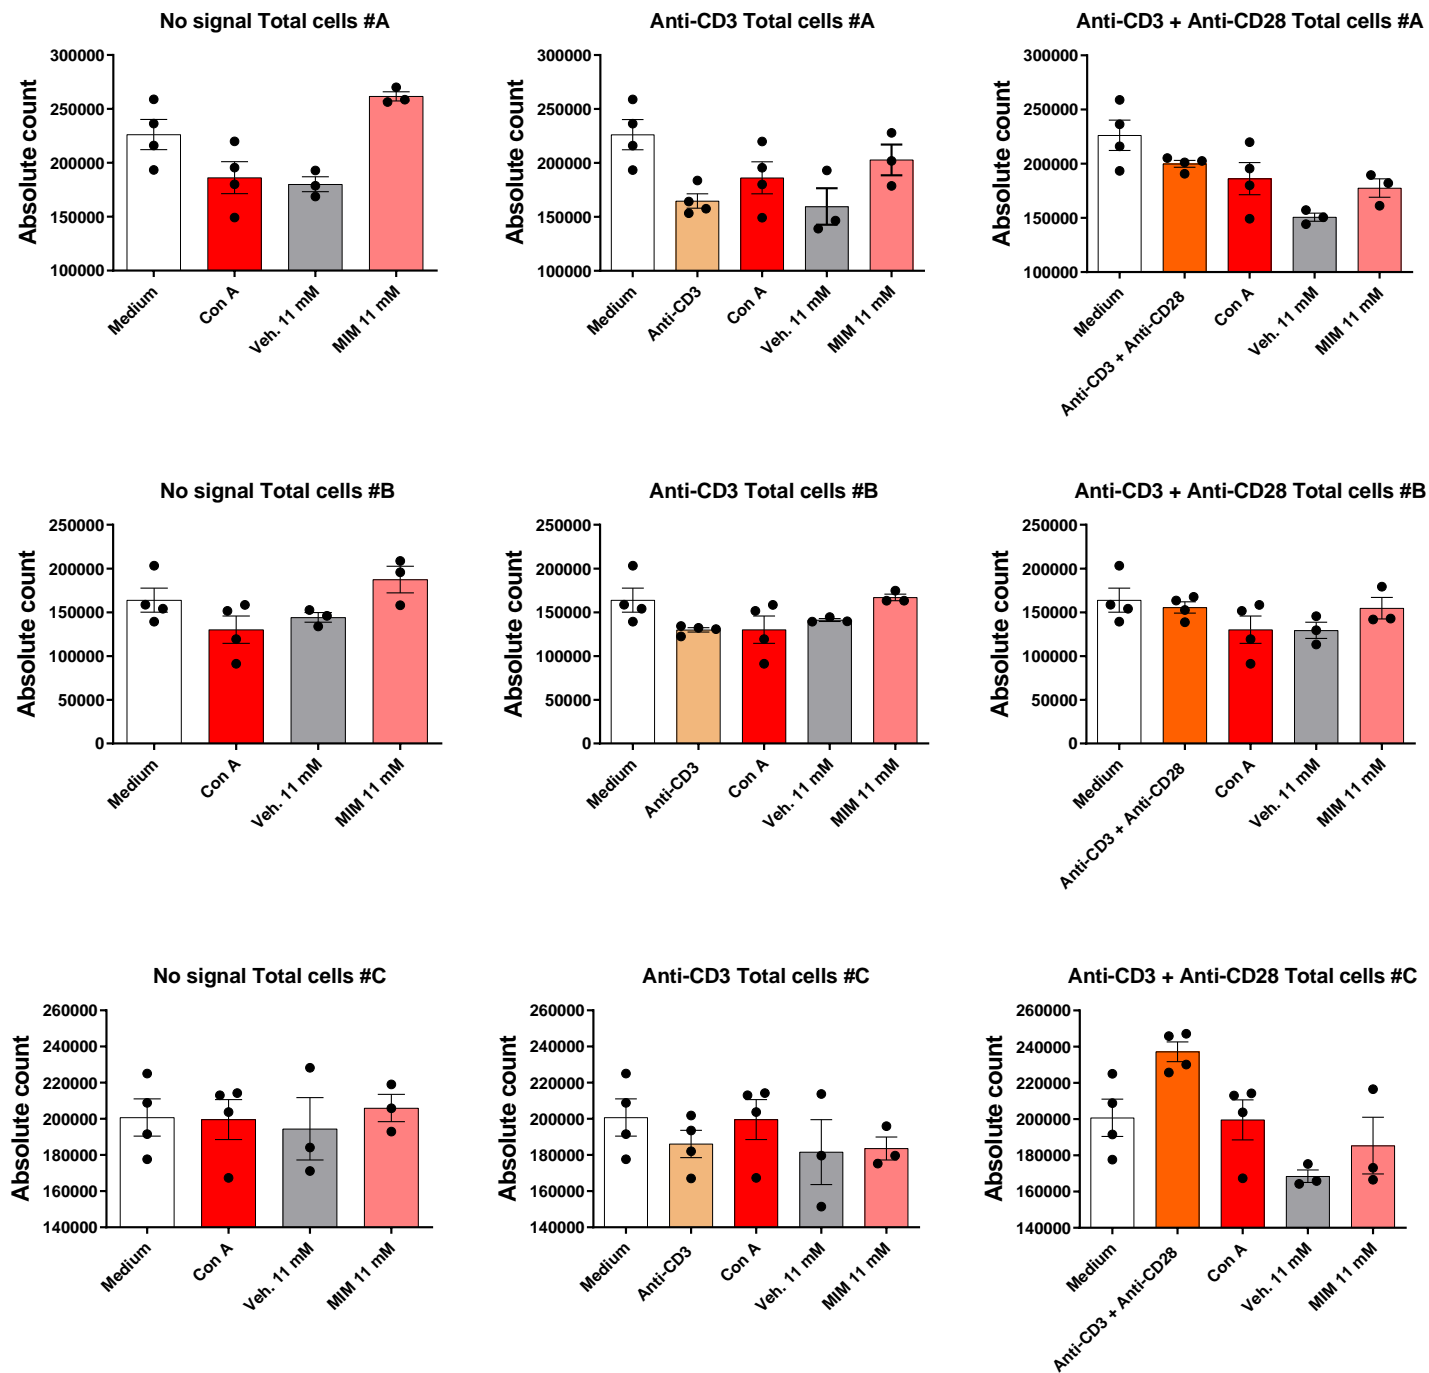

**B**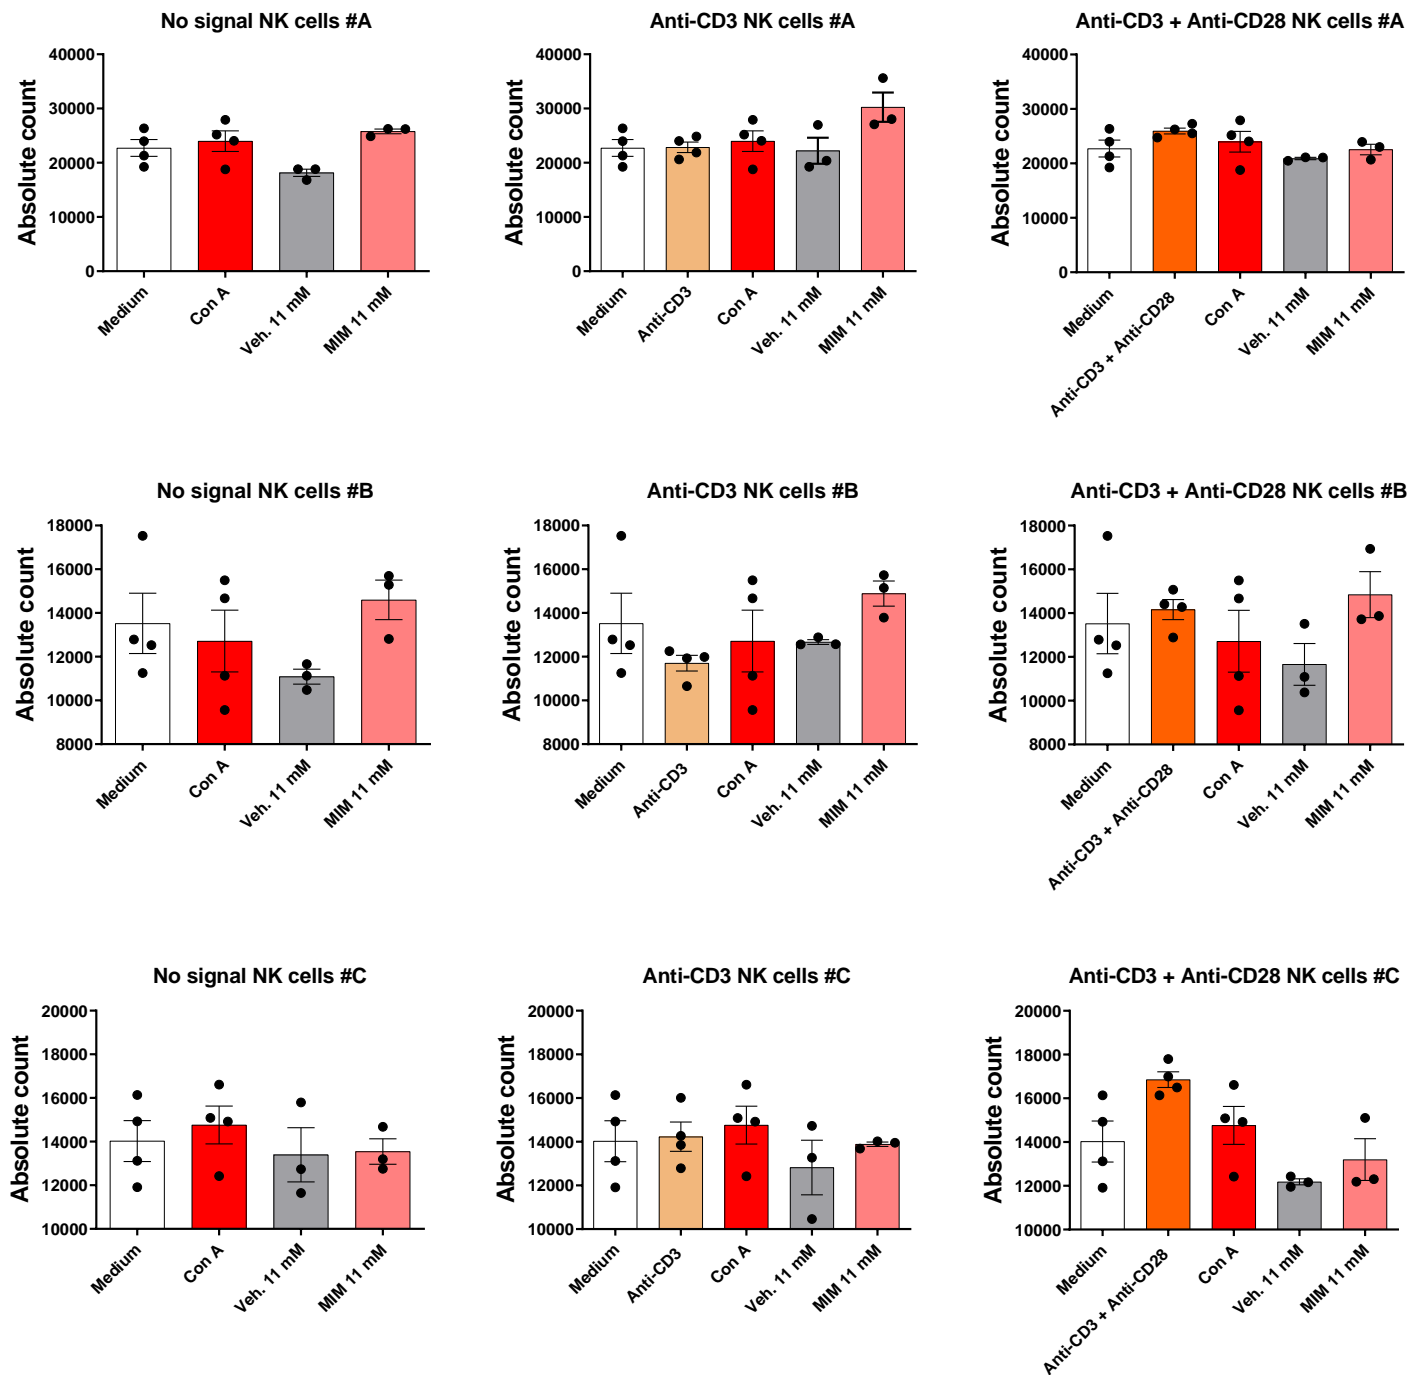

C

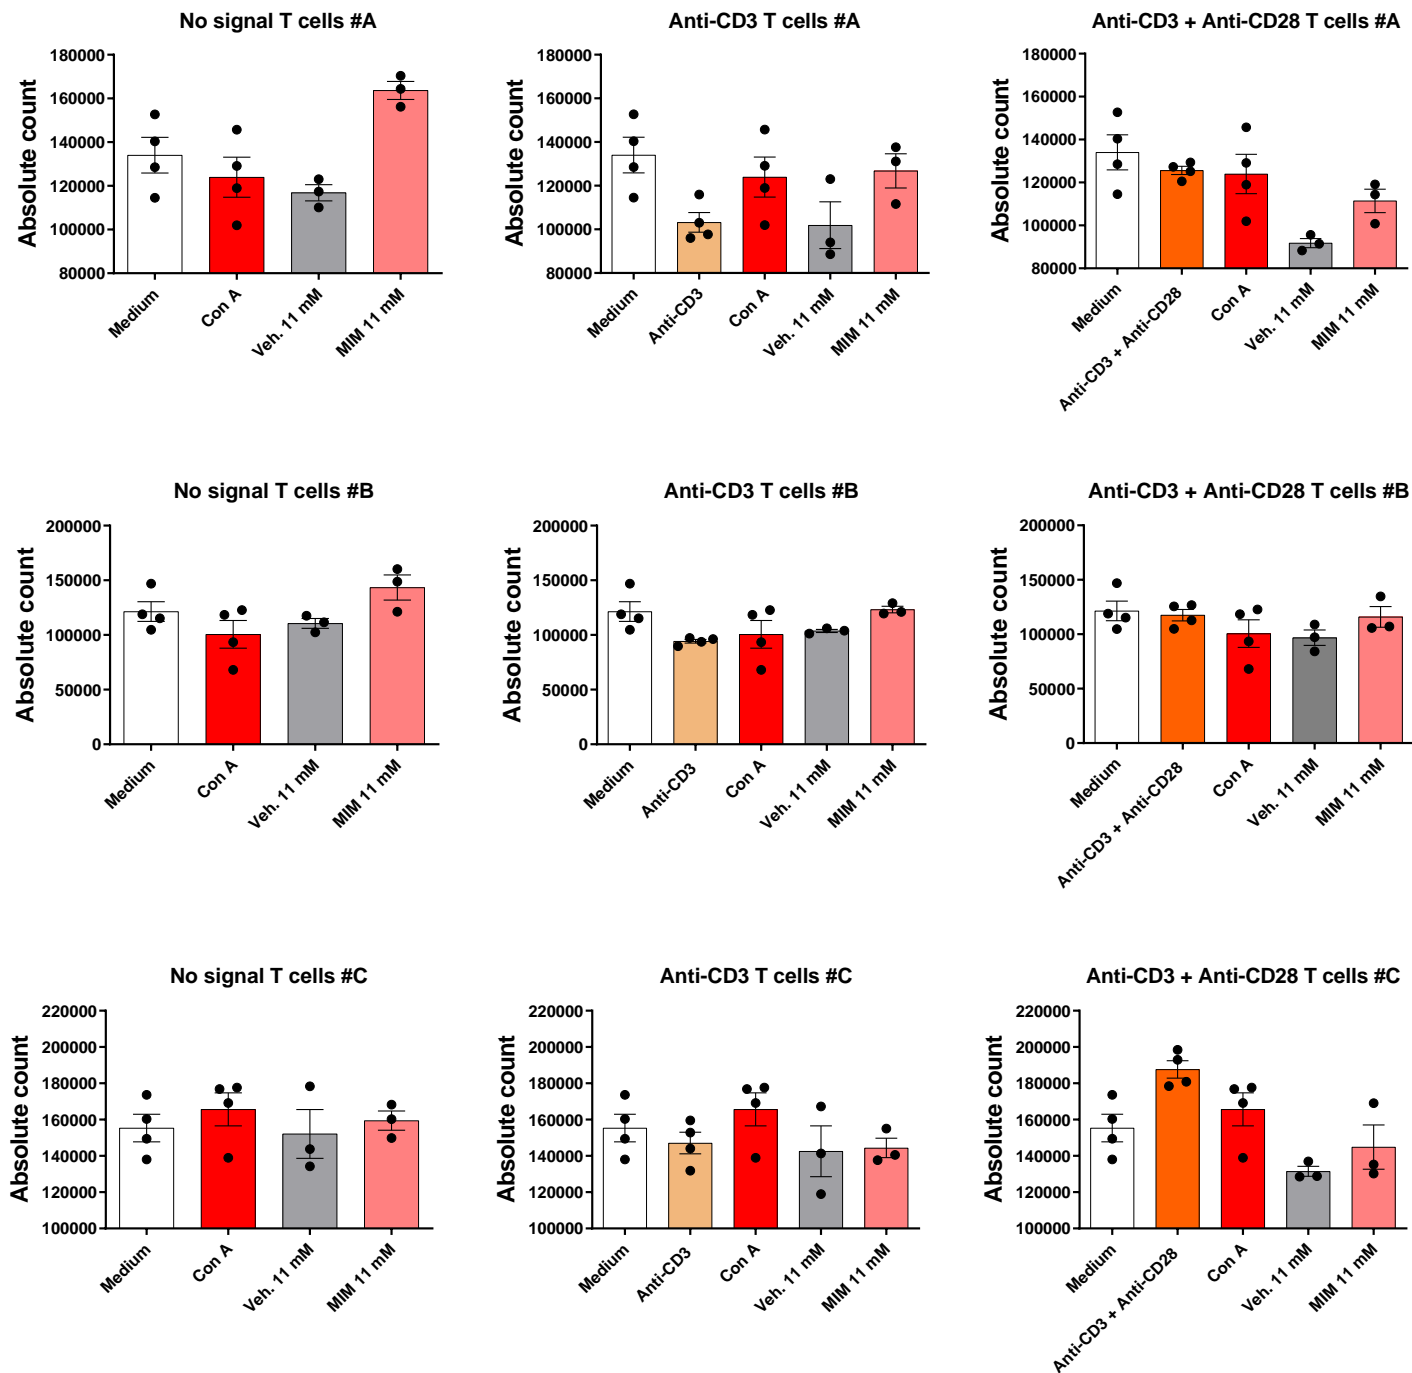

D

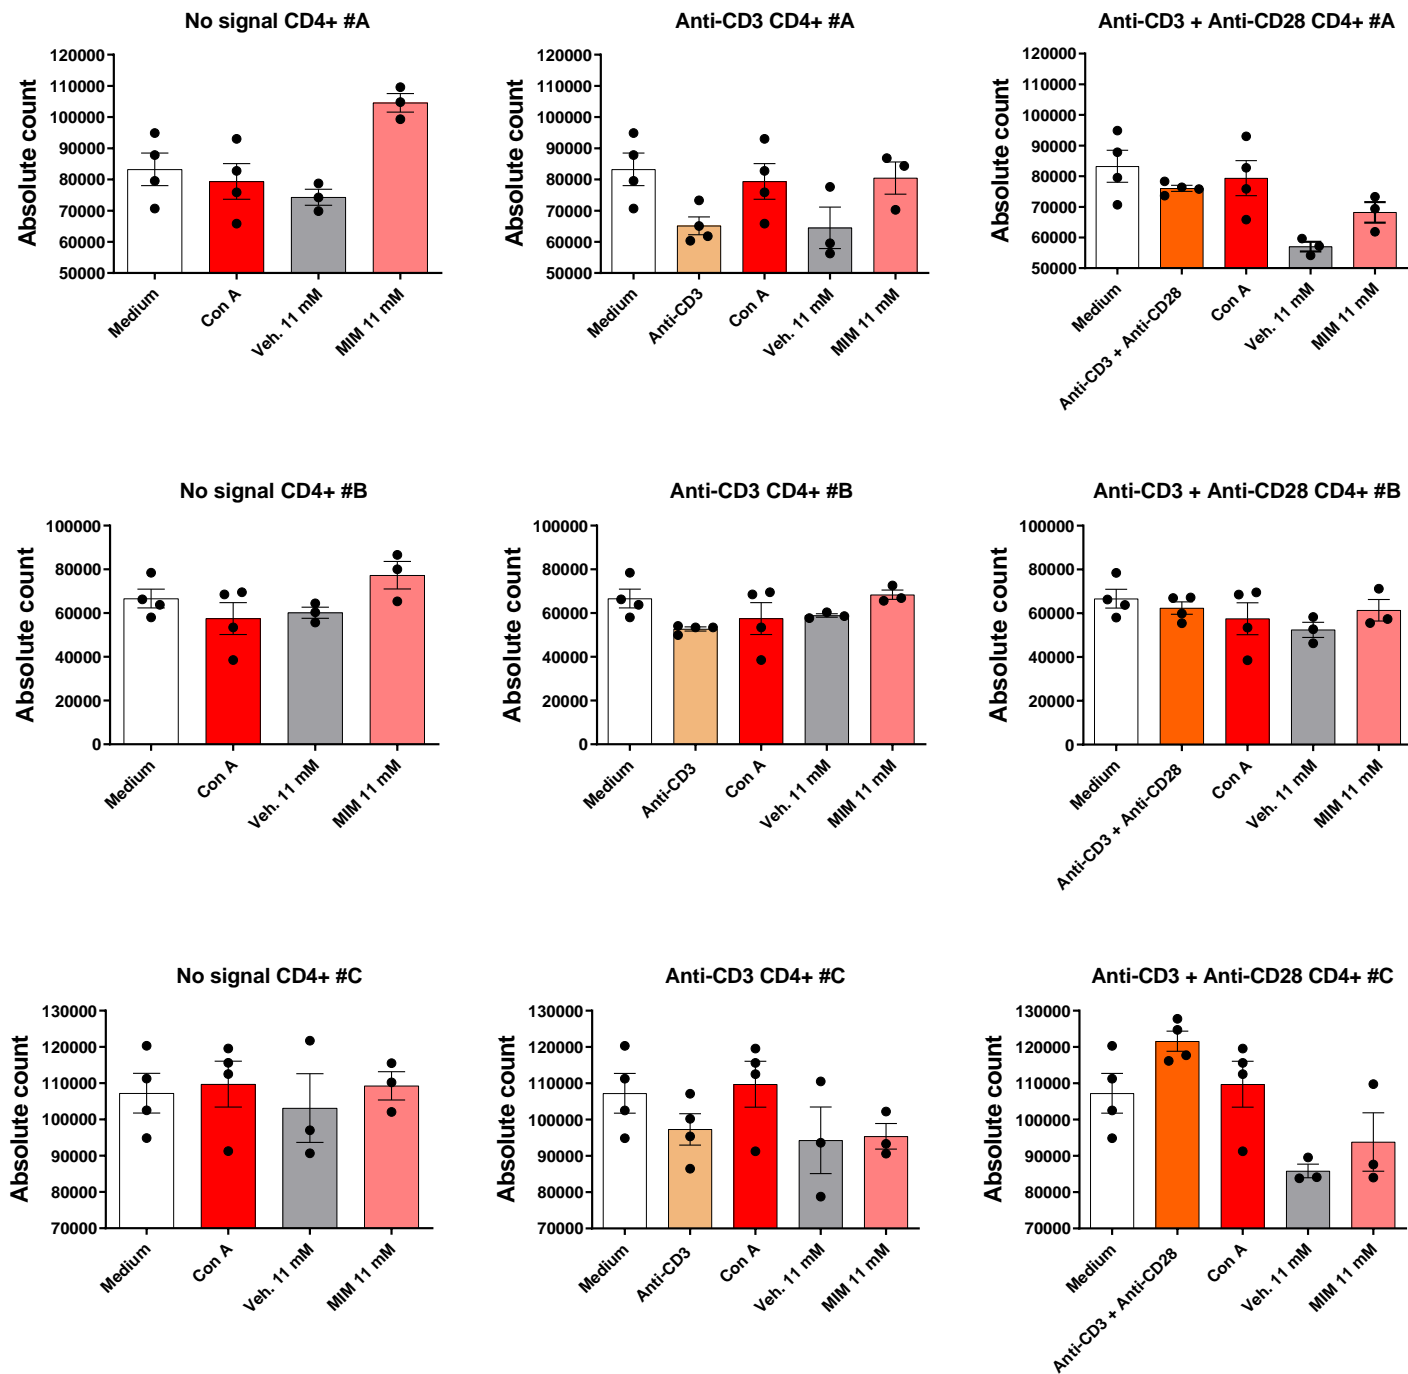

E

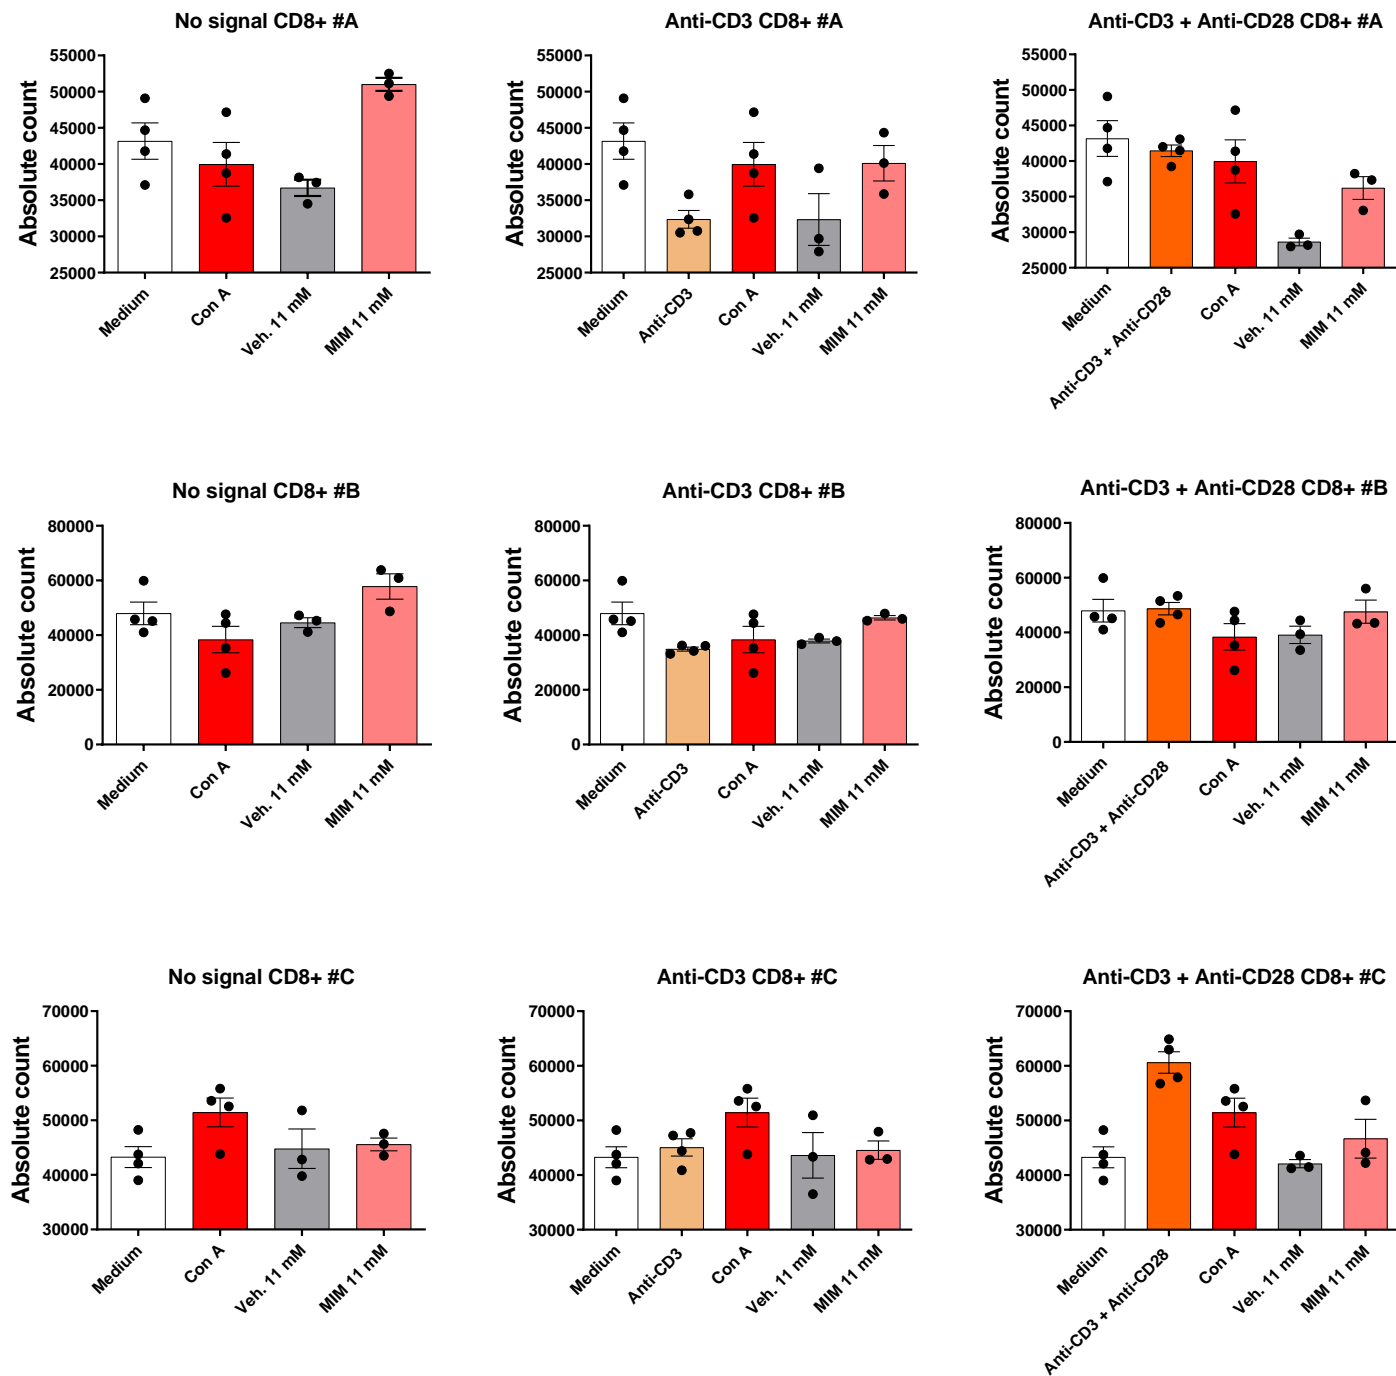

Supplement: s1 [file s1]
